# Supplementary material for: Structural analysis of the chicken FANCM–MHF complex and its stability
Source: PubMed Central journal article supplement (PMC7805551; doi:10.1107/s2053230x20016003), 2021-01-01
Supplement: f-77-00001-sup1.pdf [file f-77-00001-sup1.pdf]

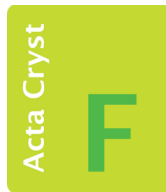

STRUCTURAL BIOLOGY  
COMMUNICATIONS

**Volume 77 (2021)**

**Supporting information for article:**

**Structural analysis of the chicken FANCM–MHF complex and  
its stability**

**Sho Ito and Tatsuya Nishino**

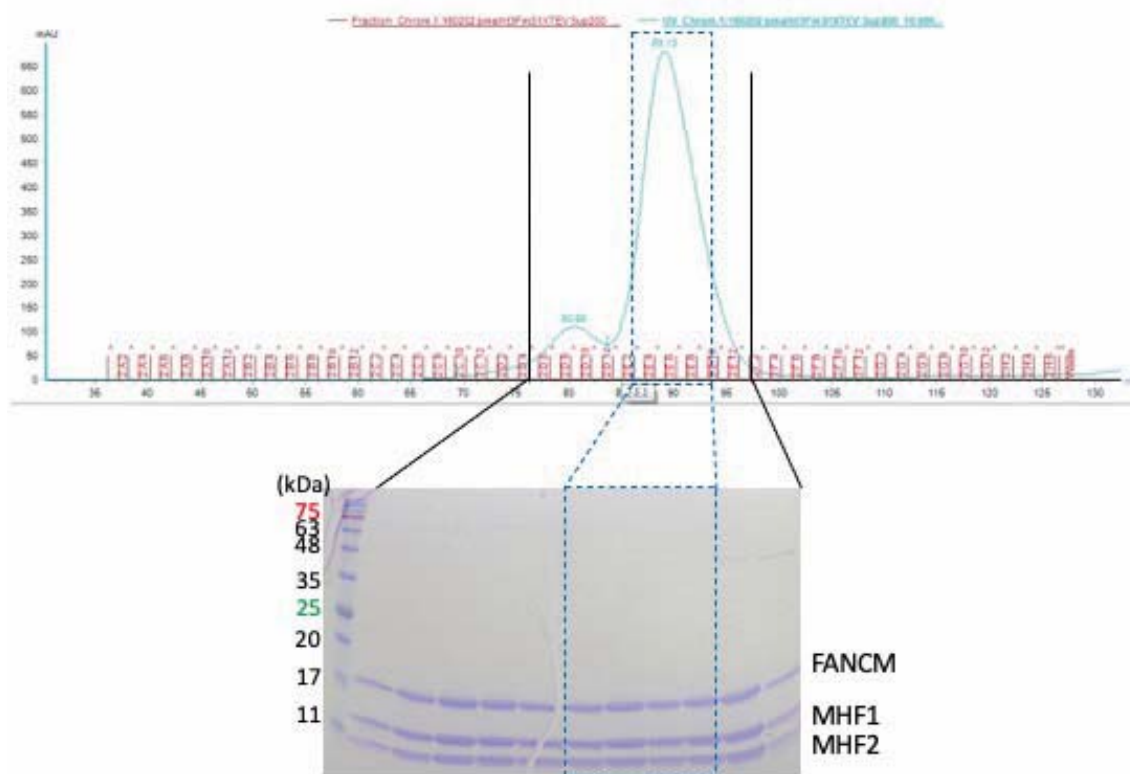

**Figure S1** Gel filtration profile and SDS-PAGE analysis of purified FANCM-MHF complex.

Fractions surrounded by blue dashed lines were collected and concentrated by ultrafiltration.
